# Supplementary material for: Cd2NF, an analogue of CdO
Source: Royal Society of Chemistry journal article supplement (doi:10.1039/c8dt01137k), 2018-01-01
Supplement: c8dt01137k1.pdf [file c8dt01137k1.pdf]

## Supporting Information

### $\text{Cd}_2\text{NF}$ , an analogue of $\text{CdO}$

Krishnappa Manjunath,<sup>a</sup> Suchitra Prasad,<sup>b</sup> Umesh V. Waghmare,<sup>b</sup> and C. N. R. Rao<sup>a\*</sup>

<sup>a</sup>New Chemistry Unit, International Centre for Materials Science, Sheikh Saqr Laboratory, Jawaharlal Nehru Centre for Advanced Scientific Research, Jakkur P.O., Bangalore-560064, India.

<sup>b</sup>Theoretical Sciences Unit, Jawaharlal Nehru Centre for Advanced Scientific Research, Jakkur P.O., Bangalore-560064, India.

Table S1. Energetics of various ordering of N and F atoms in  $1\times 1\times 1$ ,  $\sqrt{2}\times\sqrt{2}\times 1$  (configuration III has been considered here), and  $2\times 2\times 2$  supercell of  $\text{Cd}_2\text{NF}$  obtained using LDA ultrasoft pseudopotential (LDA-USPP) and PAW.

| Supercell                        | $\Delta E$ (eV/u.c.) |      |
|----------------------------------|----------------------|------|
|                                  | LDA-USPP             | PAW  |
| $1\times 1\times 1$              | 0.533                | 0.51 |
| $\sqrt{2}\times\sqrt{2}\times 1$ | 0                    | 0    |
| $2\times 2\times 2$              | 0.530                | 0.28 |

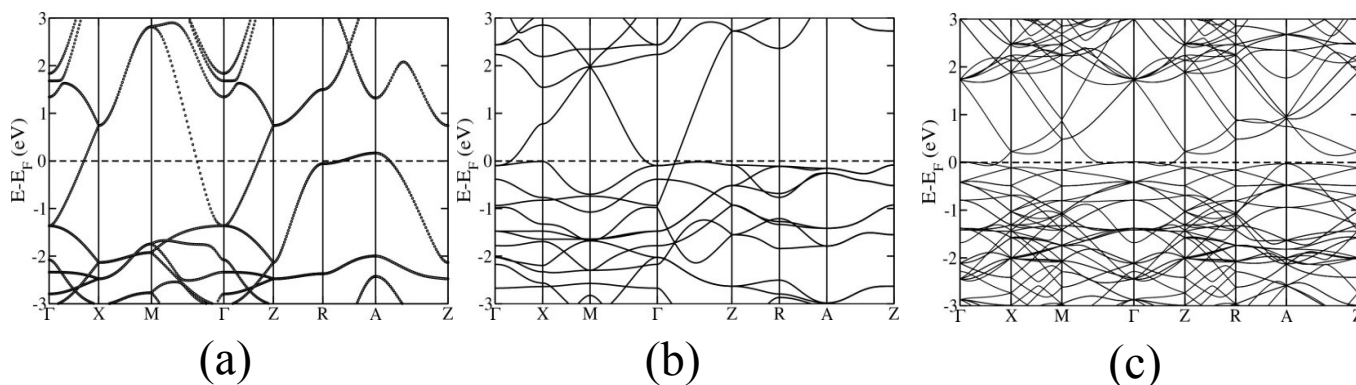

FigureS1 Electronic structure of various ordering of N and F atoms in (a)  $\sqrt{2}\times\sqrt{2}\times 1$ , and (b)  $2\times 2\times 2$  supercells of  $\text{Cd}_2\text{NF}$ , obtained from calculations based on PAW.

TableS2. Standard deviations of Rietveld-refined lattice parameters and bond lengths.

$$a=b=c= 4.7052 (\pm 5) \text{ \AA}$$

| Atom | X                 | Y                 | Z                 | Biso              | Occ     |
|------|-------------------|-------------------|-------------------|-------------------|---------|
| Cd   | 0                 | 0                 | 0                 | 0.245 ( $\pm 3$ ) | 0.47    |
| N    | 0.488 ( $\pm 1$ ) | 0.488 ( $\pm 1$ ) | 0.488 ( $\pm 1$ ) | 0.420 ( $\pm 2$ ) | N=0.382 |
| F    | 0.488 ( $\pm 1$ ) | 0.488 ( $\pm 1$ ) | 0.488 ( $\pm 1$ ) | 0.420 ( $\pm 2$ ) | F=0.218 |
